# Supplementary material for: Hysteretic Curve Characteristics in Rectangular Shear Walls Predicted by Machine Learning
Source: Research Square preprint supplement (doi:10.21203/rs.3.rs-5308377/v1), 2024-11-29
Supplement: Supplementary file 1 [file 1b3939bf463d0fde035bdfc5.xlsx]

## Sheet: Sheet1
Document source	Compressive strength of concrete(MPa)	Axial compression ratio	Yield strength of horizontal reinforcement(MPa)	Ratio of horizontal reinforcement (%)	Ratio of vertical reinforcement (%)	Ratio of vertical boundary elements reinforcement (%)	Cross-sectional area of the edge area/total cross-sectional area	M/VL	Width	Thick	Cracking displacement	Peak load(kN)	Peak displacement	Yield load(kN)	Yield displacement	Ultimate load(kN)	Ultimate displacement	Failure mode（flexure 1,flexure-shear 2,digonal ension 3,digonal compressive 4, sliding 5）	Calculated cracking displacement	Calculated yield displacement	Calculated yield load(kN)	Calculate the peak load(kN)	Calculated peak displacement	Calculated limit displacement
Effect of axial loads in the seismic behavior of reinforced concrete wallswith unconfned wall boundaries	27.4	0.15	608.9	0.72	0.44	0.45	0.228	2.5	800	50	0.45	144.3	1.8	96.6	0.6	81.3	2.7	1	0.48	0.56	169.239	225.589	1.342	2.717
Effect of axial loads in the seismic behavior of reinforced concrete wallswith unconfned wall boundaries	27.4	0.25	608.9	0.72	0.44	0.45	0.228	2.5	800	50	0.45	166	1.8	73.4	0.6	153.5	1.8	1	0.48	0.56	180.832	225.696	1.143	2.367
Effect of axial loads in the seismic behavior of reinforced concrete wallswith unconfned wall boundaries	27.4	0.35	608.9	0.72	0.44	0.45	0.228	2.5	800	50	0.225	185.6	1.2	83.6	0.3	146.5	1.5	1	0.48	0.56	192.381	225.803	0.973	2.017
Quasi-static cyclic tests and plastic hinge analysis of RC structural walls	46.05	0.051	586.1	0.25	0.3	1.32	0.175	2.245	2000	50	0.135	341.2	0.68	245	0.15	275	0.76	1	0.12	0.185	715.443	329.719	0.6906	1.472
Quasi-static cyclic tests and plastic hinge analysis of RC structural walls	41.9	0.057	490	0.25	0.3	1.32	0.175	2.245	2000	50	0.45	365	1.16	340	0.5	325	1.18	1	0.149	0.173	580	275.661	0.3	1.451
Quasi-static cyclic tests and plastic hinge analysis of RC structural walls	40.25	0.058	491.15	0.25	0.54	1.54	0.23	2.245	2000	50	1.53	450	2.06	302	1.7	420	2.04	2	0.151	0.213	904.189	578.375	0.718	1.284
Quasi-static cyclic tests and plastic hinge analysis of RC structural walls	41.8	0.057	525.8	0.25	0.54	1.54	0.23	2.245	2000	50	1.5	441	1.37	440	1.7	391	1.63	2	0.14	0.204	564.077	593.817	0.35	1.288
Quasi-static cyclic tests and plastic hinge analysis of RC structural walls	39	0.128	525.8	0.25	0.27	0.67	0.23	2.245	2000	50	0.126	442	1.01	290	0.14	355	1.35	1	0.145	0.214	625.556	296.925	0.458	0.861
Quasi-static cyclic tests and plastic hinge analysis of RC structural walls	45.75	0.108	525.8	0.25	0.54	1.54	0.23	2.245	2000	50	0.414	590	1.4	550	0.46	550	2.11	2	0.155	0.195	744.651	593.82	0.892	1.109
Seismic behavior of slender reinforced concrete walls	27.4	0.15	608.9	0.72	0.44	0.45	0.228	2.5	1600	50	0.413	145	2.2	85	0.55	68	2.75	1	0.481	0.159	93.529	427.242	1.749	2.58
Seismic behavior of slender reinforced concrete walls	27.4	0.15	523.9	0.67	0.46	0.49	0.228	2.5	1600	60	0.33	115	1.35	72	0.44	80	1.63	1	0.361	0.16	143.15	446.461	2.248	3.066
Seismic behavior of slender reinforced concrete walls	27.4	0.15	608.9	0.72	0.44	0.45	0.228	1.9	1100	60	0.233	282	1.6	80	0.31	160	1.75	1	0.274	0.159	93.529	427.242	1.749	2.58
Seismic behavior of slender reinforced concrete walls	27.4	0.15	608.9	1.34	0.44	0	0.228	2.5	1600	60	0.23	138	1.7	83	0.3	108	2.14	1	0.481	0.148	106.884	336.783	1.135	2.368
Seismic behavior of slender reinforced concrete walls	27.4	0.15	608.9	0.72	0.44	0.45	0.228	2.5	1600	60	0.27	140	1.8	85	0.36	80	2.36	1	0.481	0.159	108.788	427.242	3.505	2.191
Seismic behavior of slender reinforced concrete walls	27.4	0.15	608.9	0.72	0.44	0.45	0.228	2.5	1600	60	0.32	160	2.75	78	0.42	120	2.72	1	0.481	0.159	108.788	427.242	3.505	2.191
Seismic behavior of slender reinforced concrete walls	27.4	0.15	608.9	0.72	0.56	0.45	0.228	2.5	1600	60	0.26	142	2.8	78	0.34	70	2.68	1	0.481	0.159	108.788	543.757	3.505	2.191
Behavior of Reinforced Concrete Structural Walls: Strength,Deformation Characteristics, and Failure Mechanism	40	0	550	0.67	0.58	1.3	0.517	2.021	1200	60	0.792	333	2.2	258.3	0.88	183.3	2.2	1	0.706	0.617	603.38	168.228	3.115	2.975
Behavior of Reinforced Concrete Structural Walls: Strength,Deformation Characteristics, and Failure Mechanism	40	0.083	520	0.67	0.16	1.99	0.473	2.021	1200	60	0.711	335	1.89	225	0.79	172.7	2.38	1	0.706	0.209	208.528	440.8	2.163	2.684
Behavior of Reinforced Concrete Structural Walls: Strength,Deformation Characteristics, and Failure Mechanism	40	0.083	440	0.67	0.16	1.99	0.473	2.021	1200	60	0.792	330.9	1.36	141.6	0.88	209.1	2.2	1	0.706	0.191	174.112	373.405	2.516	2.684
Behavior of Reinforced Concrete Structural Walls: Strength,Deformation Characteristics, and Failure Mechanism	40	0.769	520	1.51	0.16	1.86	0.473	2.021	1200	60	1.013	533.3	1.83	181.8	1.125	109.1	2.7	1	0.706	0.46	404.528	440.8	2.188	2.83
Behavior of Reinforced Concrete Structural Walls: Strength,Deformation Characteristics, and Failure Mechanism	40	0.769	440	1.51	0.16	1.86	0.473	2.021	1200	60	0.702	541.6	1.65	154.5	0.78	145.5	2.33	1	0.706	0.416	364.052	373.405	2.545	2.83
Behavior of Reinforced Concrete Structural Walls: Strength,Deformation Characteristics, and Failure Mechanism	40	0	520	0.67	0.16	2.17	0.473	1.865	1300	67	0.56	430.77	2.09	300	0.62	200	2.86	1	0.719	0.572	954.5	373.778	2.96	2.92
Behavior of Reinforced Concrete Structural Walls: Strength,Deformation Characteristics, and Failure Mechanism	40	0	440	1.51	0.16	2.17	0.473	1.865	1300	67	1.24	420	1.99	280	1.38	275	3.45	1	0.719	0.488	815.054	106.49	2.96	2.92
Behavior of Reinforced Concrete Structural Walls: Strength,Deformation Characteristics, and Failure Mechanism	40	0	520	0.67	0.16	2.17	0.473	1.865	1300	75	0.767	410	1.92	260	0.852	180	2.13	1	0.719	0.572	954.5	441.17	1.105	2.92
Behavior of Reinforced Concrete Structural Walls: Strength,Deformation Characteristics, and Failure Mechanism	40	0	440	1.51	0.16	2.17	0.473	1.865	1300	75	0.574	510	1.96	310	0.638	360	2.17	1	0.719	0.488	815.054	125.69	1.105	2.92
Behavior of Reinforced Concrete Structural Walls: Strength,Deformation Characteristics, and Failure Mechanism	40	0	520	1.51	0.16	0.177	0.473	1.865	1300	80	0.736	330	1.92	240	0.818	185	2.78	1	0.719	0.262	442.097	373.778	2.955	2.92
Behavior of Reinforced Concrete Structural Walls: Strength,Deformation Characteristics, and Failure Mechanism	40	0	440	1.51	0.16	0.177	0.473	1.865	1300	80	0.684	430	1.99	280	0.76	366	2.94	1	0.719	0.224	377.792	106.49	2.955	2.92
Behavior of Reinforced Concrete Structural Walls: Strength,Deformation Characteristics, and Failure Mechanism	40	0	520	1.51	0.16	0.177	0.473	1.865	1300	80	0.644	400	1.86	260	0.715	380	1.43	1	0.719	0.262	442.097	441.17	1.105	2.92
Behavior of Reinforced Concrete Structural Walls: Strength,Deformation Characteristics, and Failure Mechanism	40	0	440	1.51	0.16	0.177	0.473	1.865	1300	80	0.709	470	1.99	265	0.788	320	2.05	1	0.719	0.224	377.792	125.69	1.105	2.92
Cyclic Load Behavior of Low-Slenderness ReinforcedConcrete Walls:Design Basis and Test Results	26.1	0	585	0.565	0.565	1.7	0.4	1.5	1200	80	0.375	195	0.96	98	0.5	140	2.2	1	0.21	0.388	100.925	344.657	0.936	2.85
Cyclic Load Behavior of Low-Slenderness ReinforcedConcrete Walls:Design Basis and Test Results	26.2	0	585	0.277	0.277	1.3	0.4	1.5	1200	80	0.503	124	1.4	76	0.67	83	2.58	1	0.21	0.387	80.388	168.978	1.652	2.85
Cyclic Load Behavior of Low-Slenderness ReinforcedConcrete Walls:Design Basis and Test Results	24.1	0	585	0.277	0.277	1.3	0.4	1.5	1200	80	0.23	175	0.88	75	0.3	78	2.2	2	0.21	0.392	57.947	168.979	1.223	2.85
Cyclic Load Behavior of Low-Slenderness ReinforcedConcrete Walls:Design Basis and Test Results	27.5	0	585	0.565	0.565	1.7	0.4	1.5	1200	80	0.315	160	1.067	70	0.42	125	2.3	1	0.22	0.378	106.679	344.657	1.108	2.85
Cyclic Load Behavior of Low-Slenderness ReinforcedConcrete Walls:Design Basis and Test Results	22.2	0	585	0.565	0.565	1.7	0.4	1	1200	80	0.03	265	0.45	110	0.04	180	0.88	5	0.06	0.389	158.184	344.658	0.396	2.85
Cyclic Load Behavior of Low-Slenderness ReinforcedConcrete Walls:Design Basis and Test Results	21.6	0.07	585	0.277	0.277	1.3	0.4	1	1200	80	0.05	190	0.38	95	0.067	130	0.88	5	0.06	0.394	175.28	168.978	0.354	2.605
Cyclic Load Behavior of Low-Slenderness ReinforcedConcrete Walls:Design Basis and Test Results	23.9	0.07	585	0.277	0.277	1.3	0.4	1	1200	80	0.0623	270	0.37	90	0.083	209	1.29	4	0.06	0.374	158.643	168.978	1.377	2.605
Cyclic Loading Tests for Shear Strength of Low-RiseReinforced Concrete Walls with Grade 550 MPa Bars	46.5	0.07	667	0.51	0.66	7.7	0.2	1	1200	80	0.46	2187	1	1858.95	0.61	678	1.05	4	0.771	1.79	485.37	746.071	0.718	3.625
Cyclic Loading Tests for Shear Strength of Low-RiseReinforced Concrete Walls with Grade 551 MPa Bars	46.5	0.07	477	0.68	0.66	7.7	0.2	1	1200	80	0.44	2331	1.25	1981.35	0.61	340	1.3	4	0.771	1.79	485.37	965.479	1.022	3.625
Cyclic Loading Tests for Shear Strength of Low-RiseReinforced Concrete Walls with Grade 552 MPa Bars	70.3	0.106	667	0.51	0.66	7.7	0.2	1	1200	80	0.428	2035	0.75	1729.75	0.57	1341	1.4	2	0.903	1.549	483.371	965.479	0.816	3.139
Cyclic Loading Tests for Shear Strength of Low-RiseReinforced Concrete Walls with Grade 553 MPa Bars	46.1	0.07	667	0.25	0.36	5.5	0.27	1	1200	80	0.135	1468	1.25	670	0.18	1030	1.21	2	0.768	1.798	402.41	526.663	1.42	3.625
Cyclic Loading Tests for Shear Strength of Low-RiseReinforced Concrete Walls with Grade 554 MPa Bars	70.3	0.106	667	0.25	0.36	5.5	0.27	1	1200	80	0.323	1931	1	1389	0.43	1160	1	2	0.889	1.549	383.419	526.683	1.861	3.139
Cyclic Loading Tests for Shear Strength of Low-RiseReinforced Concrete Walls with Grade 555 MPa Bars	46.5	0.07	667	0.25	0.36	5.5	0.27	1	1200	80	0.345	2060	0.8	1200	0.46	1550	1.25	2	0.771	1.79	381.878	526.663	2.507	3.625
Cyclic Loading Tests for Shear Strength of Low-RiseReinforced Concrete Walls with Grade 556 MPa Bars	46.5	0.07	667	0.25	0.36	0.8	0.27	1	1200	80	0.15	1121	0.6	674	0.2	940	1.63	3	0.771	0.818	190.358	526.663	2.507	3.625
Earthquake-Resistant Squat Walls Reinforced with High-Strength Steel	39	0.45	413	0.34	1.31	2.74	0.3	1	2032	80	0.2	1122	0.67	659	0.25	728	2.94	3	0.206	0.119	168.163	313.11	1.132	0.965
Earthquake-Resistant Squat Walls Reinforced with High-Strength Steel	38	0.45	785	0.17	0.2	1.38	0.3	1	2032	80	0.32	1104	0.93	690	0.4	971	3.37	3	0.204	0.178	296.255	831.305	1.448	1.15
Earthquake-Resistant Squat Walls Reinforced with High-Strength Steel	44	0.8	413	0.86	0.89	4.74	0.3	1	2032	80	0.18	1969	0.66	1561	0.2	763	1.59	3	0.213	0.115	1013.94	1943.93	2.433	0.027
Earthquake-Resistant Squat Walls Reinforced with High-Strength Steel	44	0.8	785	0.43	0.5	2.5	0.3	1	2032	80	0.27	1808	1.4	1040	0.3	971	1.87	3	0.213	0.143	238.217	2075.64	0.8591	0.027
EXPERIMENTAL CAMPAIGN OF THIN REINFORCED CONCRETE SHEARWALLS FOR LOWRISE CONSTRUCTIONS	28.9	0	500	0.39	0.2	0.8	0.21	1.09	1600	80	0.075	309	0.35	127.3	0.1	100	0.85	3	0.748	0.422	96.3	409.18	0.398	1.282
EXPERIMENTAL CAMPAIGN OF THIN REINFORCED CONCRETE SHEARWALLS FOR LOWRISE CONSTRUCTIONS	28.9	0	500	0.39	0.2	0.8	0.21	1.09	1600	100	0.06	218.2	0.6	81.8	0.08	118.2	1.6	5	0.748	0.422	208.049	409.18	0.398	1.282
EXPERIMENTAL CAMPAIGN OF THIN REINFORCED CONCRETE SHEARWALLS FOR LOWRISE CONSTRUCTIONS	28.9	0	500	0.51	0.26	0.8	0.21	1.09	1600	100	0.15	409.1	0.63	136.4	0.2	118.2	1.25	3	0.748	0.767	227.683	527.99	0.568	1.282
EXPERIMENTAL CAMPAIGN OF THIN REINFORCED CONCRETE SHEARWALLS FOR LOWRISE CONSTRUCTIONS	28.9	0	500	0.28	0.14	0.8	0.21	1.09	1600	100	0.1125	254.5	0.35	54.5	0.15	72.7	1	3	0.748	0.355	117.341	290.362	0.398	1.282
EXPERIMENTAL CAMPAIGN OF THIN REINFORCED CONCRETE SHEARWALLS FOR LOWRISE CONSTRUCTIONS	28.9	0	500	0.4	0.2	0.8	0.21	1.09	1600	100	0.075	281.8	0.35	127.3	0.1	154.5	1.63	3	0.748	0.627	100.783	409.176	0.315	1.282
EXPERIMENTAL CAMPAIGN OF THIN REINFORCED CONCRETE SHEARWALLS FOR LOWRISE CONSTRUCTIONS	28.9	0	500	0.28	0.14	0.8	0.21	1.09	1600	100	0.158	418.2	0.73	81.8	0.2	227.3	1.25	3	0.748	0.627	190.654	290.362	0.108	1.282
EXPERIMENTAL CAMPAIGN OF THIN REINFORCED CONCRETE SHEARWALLS FOR LOWRISE CONSTRUCTIONS	28.9	0	500	0.39	0.25	0.6	0.21	1.09	1600	100	0.038	327.3	0.6	118.2	0.05	100	1.03	3	1.168	0.422	134.256	508.188	0.121	1.332
EXPERIMENTAL CAMPAIGN OF THIN REINFORCED CONCRETE SHEARWALLS FOR LOWRISE CONSTRUCTIONS	28.9	0	500	0.28	0.17	0.6	0.21	1.09	1600	100	0.08	286.4	0.75	68.2	0.1	168.2	1.55	3	1.168	0.355	134.352	349.769	0.121	1.332
EXPERIMENTAL CAMPAIGN OF THIN REINFORCED CONCRETE SHEARWALLS FOR LOWRISE CONSTRUCTIONS	28.9	0	500	0.4	0.25	0.6	0.21	1.09	1600	100	0.09	272.7	0.63	113.6	0.1	218.2	1.1	3	1.168	0.627	101.292	508.188	0.307	1.332
EXPERIMENTAL STUDY ANDTHEORETICALANALYSIS ON SEISMICPERFORMANCE OF CONCRETE WALLSREINFORCED BY 600 MPA BARS	34.9	0.1	476	1	1	2	0.45	2.25	1000	100	0.53	230.05	1.63	150.24	0.66	178.4	3.19	1	0.741	0.512	240.023	285.706	0.481	2.47
EXPERIMENTAL STUDY ANDTHEORETICALANALYSIS ON SEISMICPERFORMANCE OF CONCRETE WALLSREINFORCED BY 601 MPA BARS	34.9	0.1	642	0.67	0.67	1.5	0.5	2.25	1000	100	0.66	225.35	1.69	185.45	0.82	176.06	2.92	1	0.741	0.276	63.653	386.539	0.542	2.03
EXPERIMENTAL STUDY ANDTHEORETICALANALYSIS ON SEISMICPERFORMANCE OF CONCRETE WALLSREINFORCED BY 602 MPA BARS	34.9	0.2	642	0.67	0.67	1.5	0.5	2.25	1000	100	0.512	258.22	1.73	208.92	0.64	232.83	2.16	2	0.741	0.276	65.583	386.539	0.461	2.03
EXPERIMENTAL STUDY ANDTHEORETICALANALYSIS ON SEISMICPERFORMANCE OF CONCRETE WALLSREINFORCED BY 603 MPA BARS	34.9	0.1	642	0.33	0.33	6	0.5	2.25	1000	100	1.15	390.32	2.08	319.36	1.44	245.16	2.61	2	0.741	0.531	60.426	372.067	0.418	2.383
Experimental and Analytical Studies of Moderate Aspect RatioReinforced Concrete Structural Walls	34.5	0.073	500	0.27	0.27	3.23	0.4	2	1219.2	100	0.42	481	2.3	380	0.52	415	3.65	3	0.4	0.244	715.048	717.21	2.013	2.661
Experimental and Analytical Studies of Moderate Aspect RatioReinforced Concrete Structural Walls	34.5	0.073	414	0.61	0.61	7.11	0.4	2	1219.2	100	0.384	742	3	660	0.48	530	3.82	4	0.41	0.372	654.535	185.149	3.151	2.561
Experimental and Analytical Studies of Moderate Aspect RatioReinforced Concrete Structural Walls	34.5	0.077	500	0.32	0.32	3.23	0.4	1.5	1219.2	100	0.45	603	2.8	510	0.56	480	3.47	4	0.229	0.244	688.975	101.684	0.7232	2.502
Experimental and Analytical Studies of Moderate Aspect RatioReinforced Concrete Structural Walls	34.5	0.064	414	0.73	0.73	6.06	0.4	1.5	1219.2	100	0.52	859	1.5	780	0.65	810	2.97	4	0.202	0.248	1437.42	204	2.636	2.659
Experimental and Analytical Studies of Moderate Aspect RatioReinforced Concrete Structural Walls	34.5	0.016	414	0.61	0.61	6.06	0.4	1.5	1219.2	100	0.464	570	1.5	500	0.58	460	2.96	5	0.187	0.248	460.211	185.682	3.05	2.76
Effect of Varied Axial Force on the Seismic Performance ofReinforced Concrete Shear Walls	34.95	0.15	489.6	0.25	0.19	0.75	0.53	1.74	1700	100	0.21	472	0.72	363	0.26	401	0.8	2	0.782	1.761	212.942	214.468	2.886	2.842
Effect of Varied Axial Force on the Seismic Performance ofReinforced Concrete Shear Walls	35.025	0.15	489.6	0.25	0.19	0.75	0.53	1.735	1700	100	0.24	481	0.89	340	0.3	414	1.1	2	0.51	1.76	259.578	215.453	1.021	2.87
Effect of Varied Axial Force on the Seismic Performance ofReinforced Concrete Shear Walls	33	0.15	489.6	0.25	0.19	0.75	0.53	1.735	1700	100	0.168	467	0.6	360	0.21	397	0.71	5	0.495	1.813	237.153	215.273	0.989	2.87
Effect of Varied Axial Force on the Seismic Performance ofReinforced Concrete Shear Walls	33.9	0.15	489.6	0.25	0.19	0.75	0.53	1.735	1700	100	0.17	411	0.5	349	0.21	349	0.7	5	0.501	1.788	245.67	215.353	3.098	2.87
FARTHQUAKE RESISTANT DESIGN OFREINFORCED CONCRELE WALLS	38.9	0	480	0.32	0.43	5.89	0.4	2.92	600	100	0.584	23	2.18	12.5	0.73	18	2.81	1	0.801	0.568	102.614	149.84	0.4978	2.983
FARTHQUAKE RESISTANT DESIGN OFREINFORCED CONCRELE WALLS	38.9	0	480	0.32	0.43	5.89	0.4	2.1	600	100	0.27	29.643	1.47	12.143	0.34	27.5	1.96	2	0.888	0.757	205.598	149.84	2.959	2.983
FARTHQUAKE RESISTANT DESIGN OFREINFORCED CONCRELE WALLS	36.9	0	545	0.39	0.52	6.28	0.4	2.1	600	100	0.384	104.44	0.95	80	0.48	94.44	1.77	2	0.865	0.583	102.614	205.247	1.127	2.983
FARTHQUAKE RESISTANT DESIGN OFREINFORCED CONCRELE WALLS	38.6	0	400	0.35	0.52	6.28	0.4	2.1	600	100	0.224	116.36	1.28	65.45	0.28	98.18	1.59	2	0.885	0.761	206.554	205.247	2.1	2.983
FARTHQUAKE RESISTANT DESIGN OFREINFORCED CONCRELE WALLS	45.8	0	400	0.42	0.52	4.36	0.4	2.1	600	100	0.256	96.13	1.78	59.35	0.32	80.65	2.12	2	0.963	0.436	295.592	205.384	0.5704	2.983
FARTHQUAKE RESISTANT DESIGN OFREINFORCED CONCRELE WALLS	38.9	0	400	0.6	0.52	6.55	0.4	2.1	600	100	0.22	96.67	1.86	63.33	0.27	61.11	2.03	4	0.888	0.436	295.592	205.28	2.525	2.983
Static cyclic tests on lightly reinforced concrete shear walls	50.7	0.023	520	0.3	0.3	0	0	0.69	1000	100	0.114	214.29	0.52	158.93	0.12	169.64	2.86	5	0.099	0.332	424.416	136.47	1.785	3.424
Static cyclic tests on lightly reinforced concrete shear walls	51	0.023	0	0	0.3	0	0	0.69	1000	100	0.23	201.79	0.54	155.36	0.24	180.36	2.25	5	0.099	0.331	424.416	136.817	0.419	3.424
Static cyclic tests on lightly reinforced concrete shear walls	20.1	0.1	780	0.3	0.3	0	0	0.77	900	100	0.13	178.57	0.57	126.79	0.17	128.57	1.57	3	0.121	0.414	572.958	173.165	3.743	3.154
Static cyclic tests on lightly reinforced concrete shear walls	24.4	0.05	780	0.3	0.3	0	0	0.77	900	100	0.113	143.21	0.5	103.57	0.15	108.93	1.64	5	0.127	0.376	575.468	173.483	3.185	3.329
Behaviour and Design of Earthquake Resistant Low-Rise Shear Walls	45	0.21	450	0.8	0.8	0.73	0.432	0.75	2000	100	0.576	376.92	0.28	315.39	0.64	207.69	2.81	5	0.585	0.2542	399.169	473.341	0.4657	2.582
Behaviour and Design of Earthquake Resistant Low-Rise Shear Walls	45	0.19	450	0.8	0.8	0.68	0.62	1	2000	100	0.84	225	0.13	120.83	0.93	195.83	2.49	4	0.57	0.2487	299.811	517.035	0.7426	2.735
BEHAVIOR OF EARTHQUAKERESISTANTSQUAT SHEAR WALLS	33	0.67	480	0.63	0.55	0.73	0.432	0.58	1925	100	0.304	366.67	0.75	150	0.38	288.89	2.16	5	0.232	0.257	701.048	348.241	0.307	0.766
BEHAVIOR OF EARTHQUAKERESISTANTSQUAT SHEAR WALLS	27	1.01	480	0.9	0.9	1.05	0.3	0.58	1925	100	0.22	514.29	1.61	200	0.29	342.86	5.63	5	0.223	0.675	368.876	566.16	0.419	0.42
Nonlinear Analysis of R/C Frame-Wall Structuresto Multiple Earthquake Excitationsand Experimental Research	30	0.1	133.33	0.37	0.4	4.5	0.29	1	700	100	0.57	120.35	2.42	55.55	0.71	116.67	2.46	4	0.456	0.378	102.084	269.406	2.61	3.183
Nonlinear Analysis of R/C Frame-Wall Structuresto Multiple Earthquake Excitationsand Experimental Research	30	0.2	133.33	0.37	0.4	4.5	0.29	1	700	100	0.33	125.44	2.1	63.89	0.41	125.44	2.1	4	0.456	0.378	121.553	269.406	2.22506	2.833
Nonlinear Analysis of R/C Frame-Wall Structuresto Multiple Earthquake Excitationsand Experimental Research	30	0.3	133.33	0.37	0.4	4.5	0.29	1	700	100	0.296	134.96	2	56.94	0.37	80.56	1.67	4	0.456	0.378	139.577	269.406	1.89428	2.483
Nonlinear Analysis of R/C Frame-Wall Structuresto Multiple Earthquake Excitationsand Experimental Research	30	0.1	133.33	0.37	0.4	4.5	0.29	1.5	700	100	0.432	87.15	2.7	31.58	0.54	69.47	2.97	2	0.432	0.378	133.153	270.223	2.38216	3.183
Nonlinear Analysis of R/C Frame-Wall Structuresto Multiple Earthquake Excitationsand Experimental Research	30	0.2	133.33	0.37	0.4	4.5	0.29	1.5	700	100	0.4	88.62	2.27	53.66	0.5	68.29	2.9	2	0.432	0.378	158.548	270.223	2.02802	2.833
Nonlinear Analysis of R/C Frame-Wall Structuresto Multiple Earthquake Excitationsand Experimental Research	30	0.3	133.33	0.37	0.4	4.5	0.29	1.5	700	100	0.24	92.94	2.09	63.41	0.3	89.03	2.34	2	0.432	0.378	182.057	270.223	1.72654	2.483
Nonlinear Analysis of R/C Frame-Wall Structuresto Multiple Earthquake Excitationsand Experimental Research	30	0.1	133.33	0.37	0.4	4.5	0.29	2	700	100	0.568	70.4	2.53	46.32	0.71	65.26	2.6	1	0.408	0.378	191.408	271.367	2.06	3.183
Nonlinear Analysis of R/C Frame-Wall Structuresto Multiple Earthquake Excitationsand Experimental Research	30	0.2	133.33	0.37	0.4	4.5	0.29	2	700	100	0.4	71.96	2.5	45.45	0.5	61.82	2.65	1	0.408	0.378	227.912	271.367	1.75	2.833
Nonlinear Analysis of R/C Frame-Wall Structuresto Multiple Earthquake Excitationsand Experimental Research	30	0.3	133.33	0.37	0.4	4.5	0.29	2	700	100	0.328	74.67	2.33	55.46	0.41	52.73	2.31	1	0.408	0.378	261.707	271.367	1.49325	2.483
Seismie Behavior of Squat ReinforcedConcrete Shear Walls	19.4	0	392	0.131	0.251	1.91	0.45	1	1000	100	0.077	198	0.66	131.25	0.11	156.25	1.3	4	0.078	0.178	156.848	239.312	1.462	3.511
Seismie Behavior of Squat ReinforcedConcrete Shear Walls	19.6	0	402	0.246	0.251	1.91	0.45	1	1000	100	0.175	270	0.75	200	0.25	192.3	1.5	4	0.079	0.182	160.885	245.352	0.57	3.511
Seismie Behavior of Squat ReinforcedConcrete Shear Walls	19.5	0	402	0.381	0.251	2.4	0.45	1	1000	100	0.18	324	0.75	216.67	0.25	158.33	1.84	4	0.079	0.182	159.763	245.344	1.519	3.511
Seismie Behavior of Squat ReinforcedConcrete Shear Walls	17.6	0	314	0.131	0.259	1.47	0.45	0.69	1300	100	0.07	309	0.44	225	0.1	230	1.11	4	0.077	0.15	247.214	198.203	1.641	3.47
Seismie Behavior of Squat ReinforcedConcrete Shear Walls	18.1	0	471	0.246	0.125	1.47	0.45	0.69	1300	100	0.08	364	0.63	210	0.1	340	1.11	4	0.078	0.222	263.631	144.363	2.19	3.47
Seismie Behavior of Squat ReinforcedConcrete Shear Walls	15.7	0	471	0.246	0.259	1.47	0.45	0.69	1300	100	0.08	374	0.55	250	0.11	270	0.79	4	0.073	0.238	120.031	295.627	3.756	3.47
Seismie Behavior of Squat ReinforcedConcrete Shear Walls	17.6	0	366	0.255	0.255	1.58	0.45	0.69	1300	100	0.161	258	0.54	207.14	0.23	246.43	1.83	4	0.111	0.175	133.367	227.013	2.518	3.433
Seismie Behavior of Squat ReinforcedConcrete Shear Walls	16.4	0	367	0.25	0.25	1.64	0.45	0.69	1300	100	0.287	187	0.46	137.5	0.41	155	1.96	4	0.166	0.181	68.284	223.116	0.5549	3.312
Seismie Behavior of Squat ReinforcedConcrete Shear Walls	16.3	0	362	0.127	0.255	1.29	0.45	0.5	1400	100	0.098	235	0.35	194.44	0.14	197.22	0.83	3	0.109	0.18	214.663	221.597	3.924	3.312
Seismie Behavior of Squat ReinforcedConcrete Shear Walls	17	0	366	0.255	0.127	1.29	0.45	0.5	1400	100	0.084	304	0.5	192.86	0.12	253.57	0.79	3	0.111	0.178	203	96.706	1.183	3.312
Seismie Behavior of Squat ReinforcedConcrete Shear Walls	18.1	0	370	0.255	0.255	1.29	0.45	0.5	1400	100	0.091	289	0.35	228.57	0.13	253.71	0.79	3	0.114	0.174	221.841	154.049	0.6267	3.4
Seismie Behavior of Squat ReinforcedConcrete Shear Walls	17.1	0	366	0.125	0.25	0.99	0.45	0.35	1700	100	0.042	255	0.25	226.67	0.06	133.33	0.44	4	0.176	0.177	161.96	184.549	1.08	3.4
Seismie Behavior of Squat ReinforcedConcrete Shear Walls	19	0	366	0.25	0.125	0.99	0.45	0.35	1700	100	0.161	368	0.42	328.57	0.23	221.43	0.65	4	0.185	0.17	160.714	96.295	1.268	3.4
Seismie Behavior of Squat ReinforcedConcrete Shear Walls	18.8	0	366	0.25	0.25	0.99	0.45	0.35	1700	100	0.154	362	0.37	317.86	0.22	171.43	0.43	3	0.184	0.169	149.102	187.731	1.025	3.35
Seismie Behavior of Squat ReinforcedConcrete Shear Walls	24.2	0	0	0	0	1.04	0.45	0.69	1300	100	0.12	258	0.28	185.71	0.16	71.43	0.61	4	0.13	0.013	70.853	5.411	3.863	3.35
Seismie Behavior of Squat ReinforcedConcrete Shear Walls	17.2	0	0	0	0	1.04	0.45	0.69	1300	120	0.084	222	0.27	161.54	0.12	169.23	0.36	4	0.109	0.013	70.853	4.137	0.7757	3.35
Seismie Behavior of Squat ReinforcedConcrete Shear Walls	24.2	0	431	0.25	0	1.92	0.45	0.69	1300	120	0.14	333	0.36	232.14	0.18	303.57	0.94	4	0.13	0.0025	70.853	177.308	0.7295	3.35
Seismie Behavior of Squat ReinforcedConcrete Shear Walls	23.9	0	0	0	0.25	1.04	0.45	0.69	1300	120	0.11	323	0.21	171.43	0.14	85.71	0.53	3	0.129	0.176	70.853	177.277	0.4828	3.417
Seismie Behavior of Squat ReinforcedConcrete Shear Walls	23.9	0	0	0	0	0.96	0.45	0.5	1400	120	0.128	352	0.6	238.1	0.17	14.29	1.83	4	0.131	0.0025	75.286	4.302	0.4828	3.417
Seismie Behavior of Squat ReinforcedConcrete Shear Walls	17.7	0	0	0	0	0.96	0.45	0.5	1400	120	0.098	262	0.46	180.77	0.14	153.85	0.58	4	0.113	0.0145	75.286	4.628	1.264	3.417
Seismie Behavior of Squat ReinforcedConcrete Shear Walls	23.9	0	431	0.25	0	1.46	0.45	0.5	1400	120	0.11	491	0.64	226.42	0.14	294.34	1.13	4	0.131	0.0025	75.286	5.378	0.5008	3.417
Seismie Behavior of Squat ReinforcedConcrete Shear Walls	23.3	0	0	0	0.25	0.96	0.45	0.5	1400	125	0.98	258	0.31	232	0.13	120	0.88	4	0.13	0.179	75.286	5.31	0.9529	3.431
Seismie Behavior of Squat ReinforcedConcrete Shear Walls	23.2	0	0	0	0	1.13	0.45	0.35	1500	125	0.143	400	0.51	310	0.19	100	1.55	4	0.205	0.0025	51.395	4.817	2.417	3.431
Seismie Behavior of Squat ReinforcedConcrete Shear Walls	17.9	0	0	0	0	1.13	0.45	0.35	1500	125	0.105	356	0.63	220	0.15	210	0.75	5	0.18	0.0025	51.395	4.231	0.467	3.431
Seismie Behavior of Squat ReinforcedConcrete Shear Walls	23.1	0	431	0.25	0	1.5	0.45	0.35	1500	125	0.128	391	0.35	261.54	0.17	284.62	0.88	4	0.204	0.0145	51.395	177.206	1.105	3.431
Seismie Behavior of Squat ReinforcedConcrete Shear Walls	23.3	0	0	0	0.25	1.13	0.45	0.35	1500	125	0.13	344	0.38	214.29	0.17	142.86	1.29	4	0.205	0.0025	51.395	177.227	2.838	3.431
Experimental study on seismic behavior of reinforced concreteshear walls with low shear span ratio	32.42	0.3	453	1.16	1.16	1.07	0.3	0.5	1000	125	0.32	1230	1.11	1048	0.4	1046.14	1.35	5	0.011	0.75	95.673	595.729	1.142	2.489
Experimental study on seismic behavior of reinforced concreteshear walls with low shear span ratio	32.42	-0.1	453	1.16	1.16	1.07	0.3	0.5	1000	125	0.4	696.36	0.68	540.11	0.5	591.91	2.17	3	0.011	0.633	44.036	595.729	2.174	3.889
Experimental study on seismic behavior of reinforced concreteshear walls with low shear span ratio	32.42	0.5	453	1.16	1.16	1.07	0.3	0.5	1000	125	0.304	1400.6	0.57	1242.87	0.38	1088.82	1.25	5	0.011	0.783	116.046	595.729	0.8278	1.789
Experimental study on seismic behavior of reinforced concreteshear walls with low shear span ratio	32.42	0.3	453	1.16	1.16	1.07	0.3	0.75	1000	125	0.24	860.5	0.54	739	0.3	731.43	1.35	2	0.096	0.01	95.673	595.329	1.343	2.489
Experimental study on seismic behavior of reinforced concreteshear walls with low shear span ratio	32.42	0.3	453	1.16	1.16	1.07	0.3	1	1000	125	0.384	576.22	1.58	492.79	0.48	489.79	2.3	2	0.07	1.25	95.673	594.928	1.507	2.489
Experimental study on seismic behavior of reinforced concreteshear walls with low shear span ratio	32.42	0.3	429	0.75	1.16	1.07	0.3	0.5	1000	125	0.128	740.06	0.3	650.04	0.16	629.05	0.48	5	0.011	0.75	63.782	595.729	1.142	2.489
Experimental study on seismic behavior of reinforced concreteshear walls with low shear span ratio	32.42	0.3	499	1.68	1.16	1.07	0.3	0.5	1000	125	0.288	1346.4	1.47	1188.07	0.36	1144.44	1.15	5	0.011	0.75	47.837	595.729	1.142	2.489
Experimental study on seismic behavior of reinforced concreteshear walls with low shear span ratio	32.42	-0.1	429	0.75	1.16	1.07	0.3	0.5	1000	125	0.408	520.45	0.68	347.81	0.51	442.38	2.18	3	0.011	0.633	44.036	595.729	2.174	3.889
Experimental study on seismic behavior of reinforced concreteshear walls with low shear span ratio	32.42	0.5	429	0.75	1.16	1.07	0.3	0.5	1000	133.33	0.4	1005.3	1.72	841.18	0.51	854.51	1.75	5	0.011	0.783	116.046	595.729	0.8278	1.789
Experimental study on seismic behavior of reinforced concreteshear walls with low shear span ratio	32.42	-0.1	499	1.68	1.16	1.07	0.3	0.5	1000	150	0.264	727.46	0.9	612.63	0.33	618.34	1.79	3	0.011	0.633	44.036	595.729	2.174	3.889
Experimental study on seismic behavior of reinforced concreteshear walls with low shear span ratio	32.42	0.5	499	1.68	1.16	1.07	0.3	0.5	1000	150	0.752	899.85	2.33	654.23	0.94	764.87	3.32	5	0.011	0.783	116.046	595.729	0.8278	3.889
Experimental study on seismic behavior of reinforced concreteshear walls with low shear span ratio	32.42	0.3	429	0.75	1.16	1.07	0.3	0.75	1000	150	0.104	617.96	0.34	514.31	0.13	525.27	0.53	5	0.035	0.01	63.782	595.329	1.343	2.489
Experimental study on seismic behavior of reinforced concreteshear walls with low shear span ratio	32.42	0.3	429	0.75	1.16	1.07	0.3	1	1000	150	0.424	626.81	1.56	493.21	0.53	532.79	2.43	2	0.07	1.25	47.837	594.928	1.507	2.489
Seismic Behavior of Low-Aspect-Ratio ReinforcedConcrete Shear Walls	24.82	0	461.95	0.67	0.67	0	0	0.94	3050	150	0.43	1138.74	1.432	1037.9	0.57	978.61	1.72	3	0.485	0.637	406.777	648.365	0.823	3.408
Seismic Behavior of Low-Aspect-Ratio ReinforcedConcrete Shear Walls	42.86	0	434.37	1	1	0	0	0.54	3050	150	0.44	2550.3	1.15	1838.58	0.49	1690.32	2.21	4	0.231	0.529	1008.86	904.398	1.479	3.408
Seismic Behavior of Low-Aspect-Ratio ReinforcedConcrete Shear Walls	53.78	0	434.37	0.67	0.67	0	0	0.54	3050	150	0.68	2105.48	2.1	1868.25	0.71	1482.73	2.95	4	0.215	0.472	684.598	608.085	2.182	3.408
Seismic Behavior of Low-Aspect-Ratio ReinforcedConcrete Shear Walls	28.96	0	461.95	0.33	0.33	0	0	0.54	3050	150	0.13	948.94	1.14	830.35	0.17	919.31	2.33	4	0.179	0.683	694.423	324.198	0.7114	3.408
Seismic Behavior of Low-Aspect-Ratio ReinforcedConcrete Shear Walls	29.65	0	461.95	1	1	0	0	0.33	3050	150	0.503	3214.2	0.95	3013.31	0.67	1521.03	1.48	3	0.07	0.754	1754.45	962.996	1.643	3.408
Seismic Behavior of Low-Aspect-Ratio ReinforcedConcrete Shear Walls	26.2	0	461.95	0.67	0.67	0	0	0.33	3050	150	0.39	2554.12	0.76	2468.05	0.52	1721.91	2.38	4	0.068	1.22	1160.2	648.365	0.5522	3.408
Seismic Behavior of Low-Aspect-Ratio ReinforcedConcrete Shear Walls	26.2	0	461.95	0.33	0.33	0	0	0.33	3050	150	0.075	1406.22	0.45	803.57	0.1	1061.84	1.95	4	0.068	0.821	1074	324.107	0.5522	3.408
Seismic Behavior of Low-Aspect-Ratio ReinforcedConcrete Shear Walls	24.13	0	461.95	1.5	1.5	0	0	0.54	3050	150	0.36	2783.74	0.71	2582.86	0.48	1406.22	2.38	3	0.174	1.183	1381.24	1437.83	2.609	3.408
Seismic Behavior of Low-Aspect-Ratio ReinforcedConcrete Shear Walls	29.65	0	461.95	0.67	1.5	0	0	0.54	3050	150	0.31	2755.05	0.57	2582.86	0.41	918.34	2.81	3	0.181	1.183	1398.76	1438.03	2	3.408
Seismic Behavior of Low-Aspect-Ratio ReinforcedConcrete Shear Walls	31.72	0	461.95	0.33	1.5	0	0	0.54	3050	150	0.264	2209.73	0.714	1894.1	0.33	889.64	1.43	3	0.187	1.183	1416.96	1438.28	3.097	3.408
Seismic Behavior of Low-Aspect-Ratio ReinforcedConcrete Shear Walls	34.47	0	461.95	0.67	0.67	1.5	0.35	0.54	3050	150	0.288	1894.1	0.57	1693.22	0.36	1119.22	2.41	4	0.18	1.074	723.99	647.04	2.684	3.408
Seismic Behavior of Low-Aspect-Ratio ReinforcedConcrete Shear Walls	34.47	0	461.95	0.33	0.33	2	0.35	0.54	3050	150	0.3	1607.1	0.88	1463.6	0.33	1377.53	2.07	3	0.18	1.019	318.466	322.782	2.684	3.408
A validated numerical model for predicting the in-plane seismic response oflightly reinforced, low-aspect ratio reinforced concrete shear walls	26.1	0	610	0.57	0.57	1.7	0.4	1.6	1200	150	0.232	192.86	0.57	150	0.29	142.86	1.35	3	0.69	0.194	63.814	174.936	1.321	3.45
A validated numerical model for predicting the in-plane seismic response oflightly reinforced, low-aspect ratio reinforced concrete shear walls	24.1	0.07	610	0.28	0.28	1.3	0.4	1.6	1200	150	0.202	175.81	0.54	148.39	0.27	116.13	1.35	3	0.68	0.385	78.125	86.75	0.941	3.205
A validated numerical model for predicting the in-plane seismic response oflightly reinforced, low-aspect ratio reinforced concrete shear walls	22.2	0	610	0.57	0.57	1.7	0.4	1.1	1200	150	0.15	265	0.25	235	0.2	205	0.79	3	0.69	0.487	29.723	174.851	0.483	3.45
A validated numerical model for predicting the in-plane seismic response oflightly reinforced, low-aspect ratio reinforced concrete shear walls	21.6	0	610	0.28	0.28	1.3	0.4	1.1	1200	150	0.098	194.4	0.39	139.2	0.13	134.4	0.8	3	0.314	0.439	67.1	86.678	0.6383	3.205
A validated numerical model for predicting the in-plane seismic response oflightly reinforced, low-aspect ratio reinforced concrete shear walls	23.9	0.07	610	0.28	0.28	1.3	0.4	1.1	1200	150	0.143	270	0.34	245	0.19	205	1.2	3	0.314	0.43	67.179	86.744	0.5807	3.45
Seismic behaviour of slender reinforced concrete shear walls under highaxial load ratio	50.2	0.25	262	0.54	1.96	0	0	4	400	150	0.55	69.73	1.94	41.21	0.58	38.04	4.39	1	0.67	0.341	12.3315	32.26	1.024	2.692
Seismic behaviour of slender reinforced concrete shear walls under highaxial load ratio	41.8	0.5	262	0.54	1.96	0	0	4	400	150	0.43	79.24	1.2	47.54	0.48	58.64	1.54	4	0.636	0.372	14.619	32.263	1.303	1.817
Seismic behaviour of slender reinforced concrete shear walls under highaxial load ratio	42.9	0.5	262	1.08	1.96	0	0	4	400	150	0.44	82.41	1.14	47.54	0.49	74.49	1.54	5	0.644	0.377	15.062	32.262	2.877	1.817
SLDRCE Database on Static Tests ofStructural Members andJoint Assemblies	18.3	0.1	325	1.1	0.56	2.37	0.152	0.56	1667	150	0.17	521.8	0.66	408.7	0.24	517.39	0.68	3	0.252	0.168	163.598	470.823	0.5753	2.892
SLDRCE Database on Static Tests ofStructural Members andJoint Assemblies	18.3	0.2	325	1.1	0.56	2.37	0.152	0.56	1667	150	0.16	587.2	0.79	458.82	0.23	400	0.88	5	0.252	0.176	184.5	470.823	0.4897	2.542
SLDRCE Database on Static Tests ofStructural Members andJoint Assemblies	24.1	0.1	289	0.98	1.11	1.97	0.36	2.9	1000	150	0.24	124.65	1.97	99.48	0.32	101.47	2	5	0.289	0.151	155.026	825.281	1.271	2.892
SLDRCE Database on Static Tests ofStructural Members andJoint Assemblies	13.5	0.25	452.9	0.42	0.43	7.07	0.32	3.1	1000	150	0.4	82.1	0.68	80.1	0.57	62.25	0.75	1	0.131	0.231	91.81	231.243	1.024	2.606
SLDRCE Database on Static Tests ofStructural Members andJoint Assemblies	30.08	0.2	500	0.837	0.698	3.72	0.5	2.61	1000	150	0.472	134.1	1.96	102.75	0.59	57.41	2.21	2	0.156	0.17	81.97	50.687	2.971	2.781
SLDRCE Database on Static Tests ofStructural Members andJoint Assemblies	30.08	0.2	500	0.837	0.698	3.72	0.5	2.61	1000	150	0.592	152.2	1.98	128.5	0.74	120.37	2.03	1	0.156	0.17	81.97	50.687	2.971	2.781
Study on the Performance-based Seismic Design Method for Shear Wall Structures	19.7	0.1	392	0.57	1.08	2.69	0.2	2	1000	150	0.252	188.34	0.74	160.35	0.36	188.84	1	1	0.517	0.165	49.861	128.329	1.602	3.168
Study on the Performance-based Seismic Design Method for Shear Wall Structures	19.7	0.2	392	0.57	1.08	2.69	0.2	2	1000	150	0.32	239.49	1	202.97	0.45	239.49	1.1	1	0.517	0.178	73.091	128.329	1.364	2.818
Study on the Performance-based Seismic Design Method for Shear Wall Structures	19.7	0.3	392	0.57	1.08	2.69	0.2	2	1000	152.4	0.203	221.83	0.76	169.197	0.29	204.34	1.09	1	0.517	0.192	104.189	128.329	1.161	2.468
Study on the Performance-based Seismic Design Method for Shear Wall Structures	19.7	0.4	392	0.57	1.08	2.69	0.2	2	1000	152.4	0.2	202.18	0.53	169.19	0.29	193.34	0.63	2	0.517	0.021	143.942	128.329	0.989	2.118
Study on the Performance-based Seismic Design Method for Shear Wall Structures	37.7	0.3	392	0.57	1.08	2.69	0.2	1	1000	152.4	0.184	525.68	0.62	421.07	0.23	495.61	0.9	4	0.168	0.137	580.558	128.968	2.232	2.468
Study on the Performance-based Seismic Design Method for Shear Wall Structures	37.7	0.3	392	0.57	1.08	2.69	0.2	1.5	1000	152.4	0.272	358.02	0.63	301.16	0.34	351.53	0.75	2	0.168	0.193	387.039	128.728	2.625	3.468
Study on the Performance-based Seismic Design Method for Shear Wall Structures	37.7	0.3	392	0.57	1.08	2.69	0.2	2	1000	152.4	0.224	226.69	0.59	189.38	0.28	213.53	0.69	1	0.168	0.248	290.279	128.488	2.946	3.468
Study on the Performance-based Seismic Design Method for Shear Wall Structures	37.7	0.3	392	0.57	0.7	1.72	0.2	2	1000	200	0.2	219.66	0.41	193.34	0.25	206.5	0.58	1	0.168	0.222	245.32	616.73	0.737	3.468
Study on the Performance-based Seismic Design Method for Shear Wall Structures	37.7	0.3	392	0.57	1.08	2.69	0.2	2	1000	200	0.152	232.06	0.36	202.74	0.19	219.66	0.42	1	0.168	0.428	90.802	119.376	0.586	3.468
Study on the Performance-based Seismic Design Method for Shear Wall Structures	37.7	0.3	392	0.57	1.08	1.3	0.25	2	1000	200	0.176	257.16	0.44	219.66	0.22	246.16	0.54	2	0.168	0.278	383.891	128.488	2.946	3.468
Study on the Performance-based Seismic Design Method for Shear Wall Structures	37.7	0.3	392	0.57	1.08	1.98	0.15	2	1000	200	0.224	226.69	0.59	189.38	0.28	213.53	0.69	2	0.168	0.278	383.891	128.488	2.946	3.468
Study on the Performance-based Seismic Design Method for Shear Wall Structures	37.7	0.3	348	0.25	1.08	2.69	0.2	2	1000	203	0.296	247.31	0.6	219.66	0.37	210.2	0.8	1	0.168	0.278	383.891	128.488	2.946	3.468
Study on the Performance-based Seismic Design Method for Shear Wall Structures	37.7	0.3	392	0.75	1.08	2.69	0.2	2	1000	203	0.256	264	0.72	199.8	0.32	252.7	1.04	2	0.168	0.278	383.891	128.488	0.446	3.468
SEISMIC BEHAVIOUR OF R.C. SHEAR-WALLS: AN EXPERIMENTAL STUDY	41.1	0.1	478	0.26	0.26	0	0	1.7	970	203	0.198	39	0.51	36.8	0.22	29.3	1.16	1	0.169	0.427	172.467	31.691	0.568	2.977
SEISMIC BEHAVIOUR OF R.C. SHEAR-WALLS: AN EXPERIMENTAL STUDY	41.1	0.2	478	0.26	0.26	0	0	1.7	970	203	0.135	62.5	0.41	53.7	0.15	60.6	0.52	1	0.169	0.471	25.848	31.691	0.483	2.627
SEISMIC BEHAVIOUR OF R.C. SHEAR-WALLS: AN EXPERIMENTAL STUDY	54.8	0.1	478	0.26	0.26	2.3	0.21	1.7	970	203	0.209	64.1	0.47	54.7	0.22	25.6	1.38	2	0.196	0.432	20.253	31.787	0.35	2.977
SEISMIC BEHAVIOUR OF R.C. SHEAR-WALLS: AN EXPERIMENTAL STUDY	54.8	0.2	478	0.26	0.26	2.3	0.21	1.7	970	203	0.143	85.6	0.44	68.8	0.15	63.9	0.51	2	0.196	0.482	31.366	31.787	0.298	2.627
SEISMIC BEHAVIOUR OF R.C. SHEAR-WALLS: AN EXPERIMENTAL STUDY	41.1	0.1	478	0.26	0.26	2.3	0.21	1.7	970	203	0.198	64.2	0.58	50.8	0.22	33.3	1.03	2	0.169	0.427	10.453	31.691	0.568	2.977
SEISMIC BEHAVIOUR OF R.C. SHEAR-WALLS: AN EXPERIMENTAL STUDY	41.1	0.2	478	0.26	0.26	2.3	0.21	1.7	970	203	0.135	83.4	0.51	61.5	0.15	81.2	0.66	2	0.169	0.471	15.666	31.691	0.483	2.627
SEISMIC BEHAVIOUR OF R.C. SHEAR-WALLS: AN EXPERIMENTAL STUDY	41.1	0.1	469	0.38	0.38	6	0.21	1.7	970	203	0.324	105.1	0.95	82.1	0.36	54.7	1.09	2	0.169	0.449	12.867	45.176	0.324	2.977
SEISMIC BEHAVIOUR OF R.C. SHEAR-WALLS: AN EXPERIMENTAL STUDY	41.1	0.2	469	0.38	0.38	6	0.21	1.7	970	203	0.198	110.2	0.55	77.3	0.22	110.2	0.55	2	0.169	0.487	17.968	45.176	0.276	2.627
SEISMIC BEHAVIOUR OF R.C. SHEAR-WALLS: AN EXPERIMENTAL STUDY	41.1	0.1	469	0.38	0.38	6	0.21	1.7	970	203	0.324	109.7	1.02	85	0.36	109.4	1.19	2	0.169	0.449	12.867	45.176	0.324	2.977
SEISMIC BEHAVIOUR OF R.C. SHEAR-WALLS: AN EXPERIMENTAL STUDY	41.1	0.2	469	0.38	0.38	6	0.21	1.7	970	203	0.198	117.1	0.62	85	0.22	108	0.67	2	0.169	0.487	17.968	45.176	0.276	2.627
Effects of axial load on seismic performance of reinforced concrete wallswith short shear span	29.1	0.12	289	1.44	1.96	0	0	1.25	800	203.2	0.405	258.82	0.85	235.29	0.54	202.94	1.11	3	0.192	0.279	496.645	472.371	1.965	3.063
Effects of axial load on seismic performance of reinforced concrete wallswith short shear span	26.4	0.22	289	1.44	1.96	0	0	1.25	800	203.2	0.4	250	0.65	241.18	0.54	194.12	1	4	0.188	0.291	520.283	472.314	0.3648	2.713
Effects of axial load on seismic performance of reinforced concrete wallswith short shear span	27.6	0.38	289	1.44	1.96	0	0	1.25	800	203.2	0.13	247.06	0.341	200	0.17	202.94	0.61	4	0.193	0.305	547.344	472.34	0.768	2.363
Effects of axial load on seismic performance of reinforced concrete wallswith short shear span	28	0.44	289	1.44	1.96	0	0	1.25	800	203.2	0.21	258.82	0.37	241.18	0.28	200	0.45	4	0.188	0.306	547.518	472.348	0.225	1.943
